# Supplementary material for: Achieving high breakdown strength and energy density in all-organic sandwich-structured dielectrics by introducing polyacrylate elastomers
Source: Royal Society of Chemistry journal article supplement (doi:10.1039/d1ta09933g), 2022-01-01
Supplement: d1ta09933g1.pdf [file d1ta09933g1.pdf]

# Achieving High Breakdown Strength and Energy Density in All-Organic Sandwich Structured Dielectrics via Introducing Polyacrylate Elastomers

Chao Wang,<sup>a</sup> Guanghu He,<sup>a</sup> Sheng Chen,<sup>\*a</sup> Hang Luo,<sup>c</sup> Ying Yang,<sup>\*b, c</sup> Dou Zhang<sup>c</sup>

<sup>a</sup> Key Laboratory of Polymeric Materials and Application Technology of Hunan Province, College of Chemistry, Xiangtan University, Xiangtan 411105, Hunan Province, China. E-mail: chensheng0729@xtu.edu.cn

<sup>b</sup> Department of Plastic Surgery, Xiangya Hospital, Central South University, 87 Xiangya Road, Changsha 410008, Hunan, China. E-mail: forever\_yang@csu.edu.cn

<sup>c</sup> State Key Laboratory of Powder Metallurgy, Central South University, Changsha, Hunan 410083, China.

## Characterization

The morphology of films were characterized by scanning electron microscopy (SEM, JSM6390). Differential scanning calorimetry (DSC) traces of the films were obtained using a TA Q10 DSC instrument at a heating rates of 10°C/min during the first heating process. 1D WAXD experiments were performed on a BRUKER AXS D8 advance diffractometer with a 40 kV FL tubes as the X-ray source (Cu Ka) and a LYNXEYE\_XE detector. The scanning speed of 1D WAXD was 2°/min. Gold electrodes with a thickness of 100 nm and a diameter of 3.14 mm were sputtered on two sides of films. The dielectric performance was measured using an Agilent 4294A LCR meter with a frequency range from 10<sup>3</sup> Hz to 10<sup>7</sup> Hz at room temperature. The polarization-electric field hysteresis loops and fatigue test of charge-discharge cycling of films were performed at 200 Hz by a TF analyzer 2000 ferroelectric polarization tester (aixACT, Germany). The discharge rate of films were performed by dielectric material charge measurement system DCQ-20A.

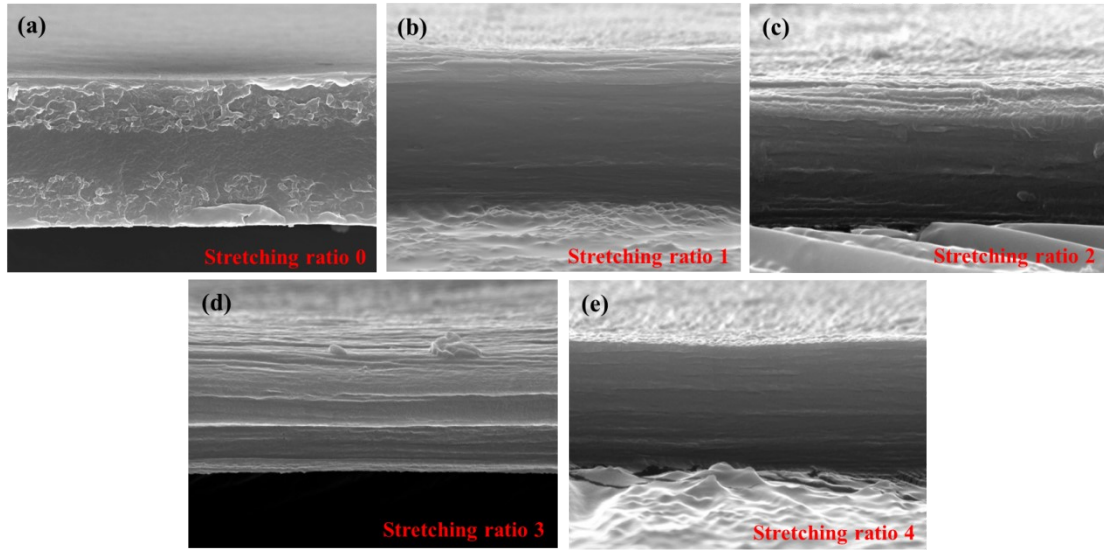

Figure S1. Cross-section SEM images of positive-sandwich structured film M-15-M with stretching ratio (a) 0, (b) 1, (c) 2, (d) 3 and (e) 4, respectively.

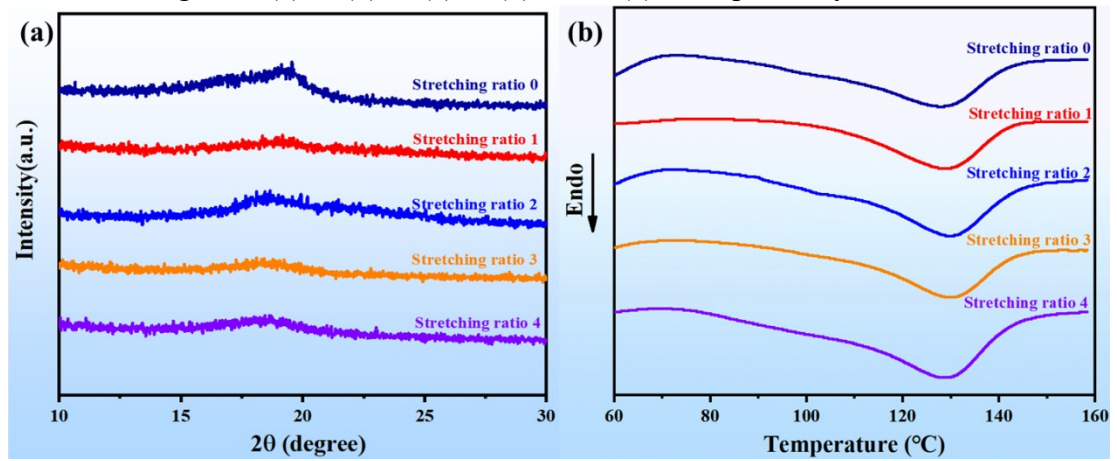

Figure S2. (a) The XRD and (b) DSC of positive-sandwich structured M-15-M films with different stretching ratio.

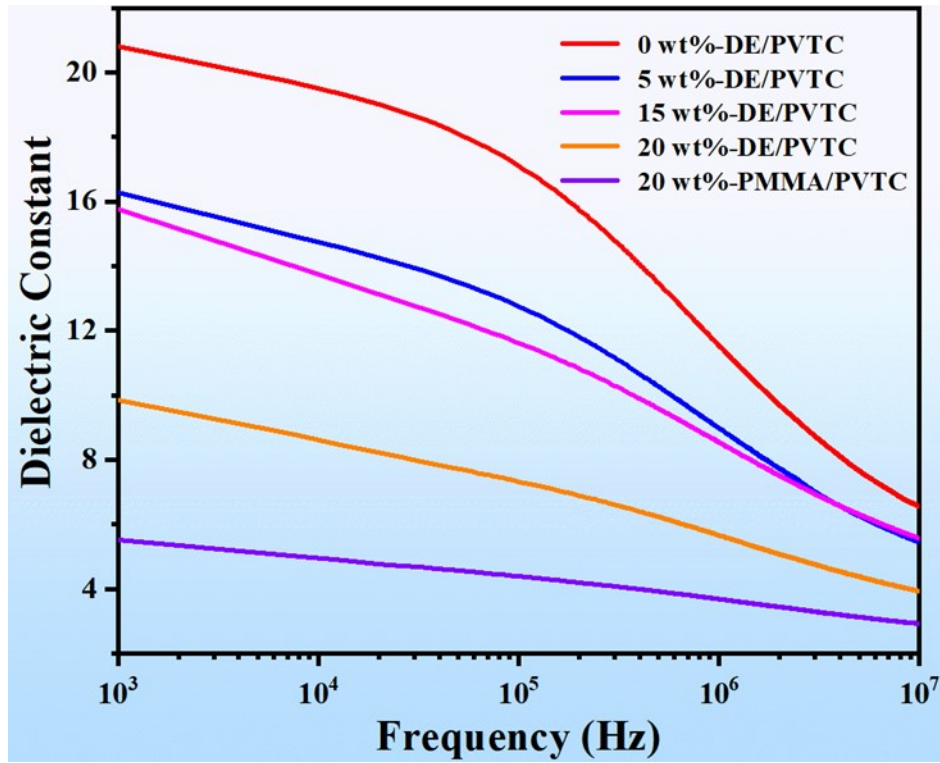

Figure S3. The frequency dependence dielectric constant of 20 wt%-PMMA/PVTC blending single layer film and DE/PVTC blending single layer films with the 0 wt%, 5 wt%, 15wt% and 20 wt% DE content, respectively.
